# Supplementary material
Source: PubMed Central journal article supplement (PMC5509478)
Supplement: NIHMS840673-supplement-2.pdf [file NIHMS840673-supplement-2.pdf]

**Supplementary Table 1.** Related to Experimental Procedures. **Pathology grading standard for tumor grading.**

| Tumor      | Standard                                                                                                   |
|------------|------------------------------------------------------------------------------------------------------------|
| Low grade  | stratified dysplastic epithelium retaining columnar shape, with the nuclei in the basal part of epithelium |
| High grade | Loss of columnar shape and the nuclei are mainly located in the surface of the crypts                      |
