# Supplementary material
Source: PubMed Central journal article supplement (PMC5509478)
Supplement: NIHMS840673-supplement-3.pdf [file NIHMS840673-supplement-3.pdf]

**Supplementary Table 2.** Related to Experimental Procedures. **Pathology grading standard for epithelial damage score.**

| Score | Standard                                 |
|-------|------------------------------------------|
| 0     | intact crypt                             |
| 1     | loss of the basal one-third of the crypt |
| 2     | loss of the basal two-third of the crypt |
| 3     | entire loss of crypt                     |
| 4     | loss of crypt and surface epithelium     |
