# Supplementary material
Source: PubMed Central journal article supplement (PMC5509478)
Supplement: NIHMS840673-supplement-4.pdf [file NIHMS840673-supplement-4.pdf]

**Supplementary Table 3.** Related to Experimental Procedures. **Pathology grading standard for inflammatory cell infiltration score.**

| Score | Standard                                                            |
|-------|---------------------------------------------------------------------|
| 0     | normal                                                              |
| 1     | mild (small, focal, or widely separated, limited to lamina propria) |
| 2     | moderate (multifocal or locally extensive, extending to submucosa)  |
| 3     | strong (transmural inflammation throughout submucosa)               |
| 4     | severe (transmural inflammation with ulcers covering >20 crypts)    |
