# Supplementary material
Source: PubMed Central journal article supplement (PMC5509478)
Supplement: NIHMS840673-supplement-5.pdf [file NIHMS840673-supplement-5.pdf]

Table S4 Realtime PCR primer sequence

Mouse primer

| Gene Symbol | Forward primer          | Reverse Primer            |
|-------------|-------------------------|---------------------------|
| mTcf1       | GGAAAAACATCAAGAATCCACCA | GGGGACAGCCTAGAGCACTG      |
| mAxin2      | GAGGATGCTGAAGGCTCAAAG   | GTCGTCCCAGATCTCCTCAAAA    |
| mCol1A1     | TAGGCCATTGTGTATGCAGC    | ACATGTTTCAGCTTTGTGGACC    |
| mWnt1       | CTCTTCGGCAAGATCGTCAAC   | GTAGTCGCAGGTGCAGGACTC     |
| mWnt2       | GAAGCCAACGAAAAATGACCTC  | ACACATAACTTCGCAGCTGTCC    |
| mWnt2b      | CACCCGGACTGATCTTGTCTAC  | GCCACAACACATGATTTACAC     |
| mWnt-3      | GTCTTCCACTGGTGTCTGCTATG | GATCCTGCTTCTCATGGGACTT    |
| mWnt-3A     | AATTTGGAGGAATGGTCTCTCG  | CACCAGCAGGTCTTCACTTCAC    |
| mWnt4       | GAGGAGTGCCAATACCAGTTCC  | ACCTGCTGAAGAGATGGCGTAT    |
| mWnt-5A     | GCCATGTCTTCCAAGTTCTTCC  | GCAGCCACAGGTAGACAGCTC     |
| mWnt5b      | GCCGAGCTCTCATGAACCTACA  | AGCTGGAGCCAGCAGGTCTT      |
| mWnt6       | GTGGAGATATCCGTGCATTGGT  | GAAAGCCCATGGCACTTACACT    |
| mWnt7a      | TGTGGTCCAGCACGTCTTAG    | TACACAATAACGAGGCGGGT      |
| mWnt7b      | CCAGGCCAGGAATCTTGTT     | ACGTGTTTCTCTGCTTTGGC      |
| mWnt8a      | GGATGGCATGAATGAAGGAT    | GGTGAATTGTCCTGAGCAT       |
| mWnt8b      | AGACCAGGTAAGCCTTTGGA    | CCCGTGTGCGTTCTTCTAGT      |
| mWnt9a      | GGGAGGATAGTCAGGGGTTCC   | GATGCTGGATGGGTCCCT        |
| mWnt9b      | GGAAGGGTGTGAGGACCTC     | CGAGGAGATGCGAGAGTGC       |
| mWnt10a     | GCACTCTCTCGAAAACCTCG    | GAGTGCCAGCATCAGTTCC       |
| mWnt10b     | GCATGGAGAAGGAGAAAGCA    | AACTGCTCGGCACTGGAG        |
| mWnt11      | TCTGATTCAGTGCCAAGGCT    | CTGCGAGGCTCTGCTCTTT       |
| mWnt16      | TTTTCCAGCAGGTTTTTACA    | TCTACACAACAACGAAGCGG      |
| mTnfa       | GGCCTCCCTCTCATCAGTTC    | GGTTGTCTTTGAGATCCATGC     |
| mI11b       | GGTCAAAGGTTTGGAGCAG     | TGTGAAATGCCACCTTTTGA      |
| mCox2       | GGCGCAGTTTATGTTGTCTGT   | CAAGACAGATCATAAGCGAGGA    |
| mI16        | CAAAGCCAGAGTCCTTCAGAG   | TGGTCCTTAGCCACTCCTTC      |
| mI11        | AGGCGAGACATCAAGAGCTG    | GCAGGTGGTCTTCCCTAA        |
| mI1fng      | GCGTCATTGAATCACACCTGA   | ACTCCTTTTCCGCTTCTGAG      |
| mF4/80      | TTCCAAGTCTCTAACTCTGTGG  | AATAGCTTCCGAGAGTGTTGTGG   |
| mMpo        | TGCTCTCGAACAAAGAGGGT    | CTCCTCACCAACCGCTCC        |
| I17a        | GAAGGCCCTCAGACTACCTCAA  | ATTCATGTGGTGGTCCAGCTTT    |
| mI123p19    | CCAGCGGGACATATGAATCT    | AGGCTCCCCTTTGAAGATGT      |
| mI10        | GAATTCCTGGGTGAGAAGC     | TGGCCTTGAGACACCTTGG       |
| mI122       | CAGGAGGTGGTACCTTTCCTG   | TCTGGTCGTCACCGCTGAT       |
| mBclxl      | GCTGCATTGTTCCCGTAGAG    | GTTGGATGGCCACCTATCTG      |
| mSurvivin   | CAGGGGAGTGCTTTCTATGC    | TACCGAGAACGAGCCTGATT      |
| mCyclin D1  | CACGATTTCATCGAACACTTCC  | AGGGTGGGTTGGAAATGAACTT    |
| mSocs3      | AACTTGCTGTGGGTGACCAT    | AAGGCCGGAGATTTGCT         |
| mM36B4      | GCCCTGCACTCTCGCTTCT     | CAACTGGGCACCGAGGCAACAGTTG |

Human primer

|         |                      |                        |
|---------|----------------------|------------------------|
| hCAMK2G | ACCCGTTTCACCGACTAC   | CGGGCAGACAACTTCTTGGTAT |
| hGAPDH  | TGCACCACCAACTGCTTAGC | GGCATGGACTGTGGTCATGAG  |
