# Supplementary material
Source: PubMed Central journal article supplement (PMC5509478)
Supplement: NIHMS840673-supplement-6.pdf [file NIHMS840673-supplement-6.pdf]

Table S5. Antibody information

| Antibody target   | Vendor                     | Cat #    |
|-------------------|----------------------------|----------|
| CAMK2G            | Santa Cruz Biotech         | sc-12886 |
| p-CAMK2-T287      | Santa Cruz Biotech         | sc-1541  |
| HA                | Santa Cruz Biotech         | sc-7392  |
| b-Actin           | Sigma                      | A-5316   |
| p-STAT3-Y705      | Cell signalling Technology | 4904     |
| STAT3             | Cell signalling Technology | 9145     |
| p-ERK1/2-T202/204 | Cell signalling Technology | 9211     |
| p-p38-T180/Y182   | Cell signalling Technology | 9101     |
| p-IkB-a-S32/36    | Cell signalling Technology | 9246     |
| IkB-a             | Cell signalling Technology | 9242     |
| p53               | Cell signalling Technology | 2524     |
| p-Akt-T308        | Cell signalling Technology | 9275     |
| p-Akt-S473        | Cell signalling Technology | 4060     |
| Akt               | Cell signalling Technology | 9272     |
| b-Catenin         | Cell signalling Technology | 8480     |
| p-p65-S536        | Cell signalling Technology | 3031     |
| PTEN              | Cell signalling Technology | 9559     |
| BCL2              | Cell signalling Technology | 3498     |
| GAPDH             | Cell signalling Technology | 2118     |
